# Supplementary material
Source: PubMed Central journal article supplement (PMC4907145)
Supplement: IAI.00011-16_zii999091729so1.pdf [file IAI.00011-16_zii999091729so1.pdf]

## SUPPLEMENTARY METHODS

### Generation and confirmation of *ArbdA*, *AdscE* and *AdigA* deletion mutants and

***rbdA* reconstituted strain.** *A. fumigatus* CEA17 *AkuB*<sup>KU80</sup> (1) was used as a wild-type in all experiments. Deletion and reconstituted strains were created using the Yeast Gateway system. Briefly, to generate the knockout strains (*ArbdA*, *AdscE* and *AdigA*), a ~1 kb DNA fragment flanking the *A. fumigatus rbdA*, *dscE* & *digA* genes was generated by PCR, using the Expand high-fidelity PCR system (Roche Diagnostic, Penzberg, Germany) and primers designed to contain P1, P2 (for 5' flanks) and P3, P4 (for 3' flanks) sequences [Supplemental Table S2]. As a selection marker, we used the *hph* resistance cassette (~2300 bp), carrying a hygromycin B resistance gene with the *gpdA* promoter and terminator of *A. nidulans*. These fragments were transformed, together with a *HindIII/XhoI* linearized pYES-2 cloning vector, into BY7470 chemically competent *S. cerevisiae* yeasts to yield the cloning vectors: pYES2-*ArbdA* ( primers: P1-rbdA, P2-rbdA-KO, P3-rbdA-KO, P4-rbdA-KO), pYES2-*AdscE* (primers: P1-dscE-KO, P2-dscE-KO, P3-dscE-KO, P4-dscE-KO) and pYES2-*AdigA* (primers: P1-digA-KO, P2-digA-KO, P3-digA-KO, P4-digA-KO) Supplemental Table S2 and Supplemental Fig. S2 A. Each of these plasmids was validated by PCR and sequencing. The validated plasmids were linearized, using the *PsiI* restriction enzyme, and transformed into the *AkuB*<sup>KU80</sup> background strain protoplasts as previously described (2). PCR validation for the *ARbdA*, *ADscE* strains is shown in Supplemental Fig. S1 (A).

To generate the *rbdA* knockin strain (*rbdA*-KI), a ~2.5 kb DNA fragment flanking the *A. fumigatus RbdA* gene (1.1 kb upstream and 300 bp downstream to *rbdA*) was generated by PCR, using the Expand high-fidelity PCR system (Roche Diagnostic, Penzberg, Germany) and primers designed to contain P1, P5 (for the 5' flank + *rbdA*

fragment) and P6, P7 (for 3' flanks) sequences (primers: P1-rbdA, P5-rbdA-KI, P6-rbdA-KI and P7-rbdA-KI) (Supplemental Table S2 and Supplemental Fig. S2B). As a selectable marker, we used the *phleo* resistance cassette (~2500 bp), carrying a phleomycin resistance gene with the *gpdA* promoter and terminator of *A.nidulans*. These fragments were transformed, together with *HindIII* /*XhoI* linearized pYES-2 cloning vector, into BY7470 chemically competent *S. cerevisiae* yeasts to yield the cloning vector: pYES2-*rbdA*-KI. This plasmid was validated by PCR and sequencing. The validated plasmid was linearized, using *PsiI* restriction enzyme, and transformed into the *ΔrbdA* knockout strain protoplasts as mentioned. Three or more independent mutants were identified and verified for each strain by means of PCR, using the primers: *rbdA*-fwd-val and *rbdA*-rev-val, *dscE*-fwd-val and *dscE*-rev-val, Hyg-fwd and Hyg-rev, Phleo-fwd and Phleo-rev respectively (Supplemental Table S2). PCR validation for the *RbdA-KI* strain is shown in Supplementary Fig. 1 (B) and by Southern blot as described below.

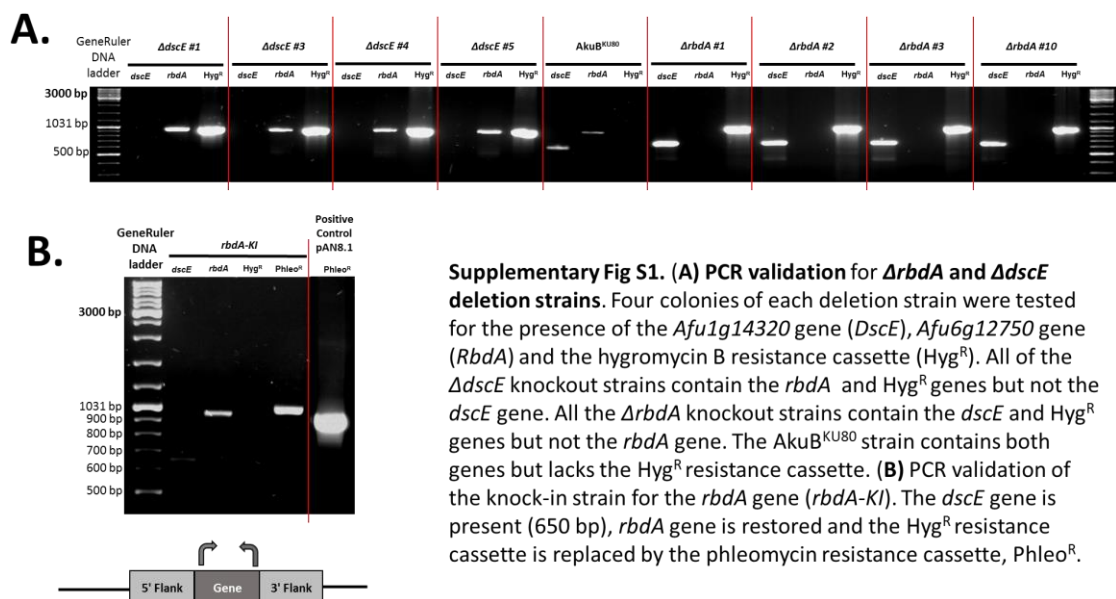

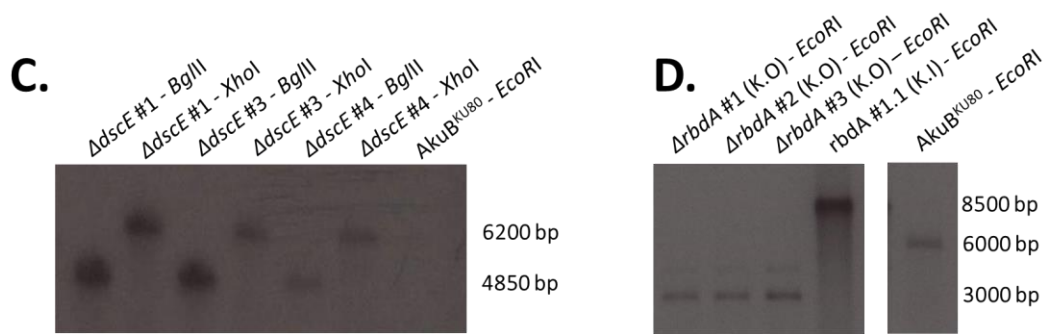

**Supplementary Fig S1. (C) Southern Blot analysis for the  $\Delta dscE$  /Afu1g14320 null strains.**

Genomic DNA from each strain was digested with either *Bgl*II or *Xho*I restriction enzyme. The blot was hybridized with a radiolabeled *Hyg*<sup>R</sup> probe. All colonies except for the  $AkuB^{KU80}$  were labeled as expected.

**(D) Southern Blot analysis for the  $\Delta rbdA$ /Afu6g12750 null and  $rbdA$ -KI reconstituted strains.**

Genomic DNA from each strain was digested with *Eco*RI. The blot was hybridized with a radiolabeled probe matching a short sequence upstream to the *rbdA* gene. The original length of the digested fragment is 5968 bp as shown for the  $AkuB^{KU80}$  strain. Gene deletion yielded a shorter (2957 bp) fragment, while gene reconstitution in the  $rbdA$ -KI strain resulted in a larger (8487 bp) fragment.

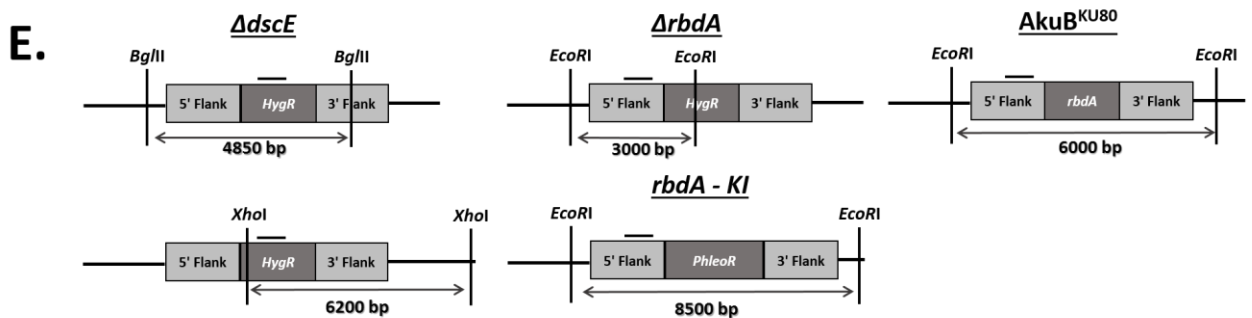

**Supplementary Fig 1. (E) Southern Blot restriction maps for the  $\Delta dscE$  /Afu1g14320**

$\Delta rbdA$ /Afu6g12750 null and  $rbdA$ -KI and  $AkuB^{KU80}$  strains. The radiolabeled probe is designated by a line above the gene map.

**Southern verification of  $\Delta RbdA$ ,  $\Delta DscE$  and  $RbdA$ -KI.** Southern analysis was performed as previously described (2). <sup>32</sup>P-*hph*-labeled DNA probe (generated by using *Hyg*-fwd and *Hyg*-rev primers- Supplemental Table S2). was used to verify correct integration of the deletion construct into the *dscE* gene locus of the  $\Delta dscE$  strain, resulting in a single 4580 bp fragment (when the DNA was cut with *Bgl*II restriction enzyme) or a 6200 bp fragment (when the DNA was cut with *Xho*I restriction enzyme) (Supplemental Fig. S1C, E).

<sup>32</sup>P- *rbdA* labeled DNA probe (generated by using P1-*rbdA* and P5-*rbdA*-KI primers Supplemental Table S2) was used to verify correct integration of the deletion construct and insertion construct into the *rbdA* gene locus of the  $\Delta$ *rbdA* and *rbdA*-KI strains. The probe is complementary to the 5' flank locus of the constructs, resulting in a single 3000 bp band for the  $\Delta$ *rbdA* strain, a single 8500 bp band for the *rbdA*-KI strain and a single 6000 bp band for the *AkuB*<sup>KU80</sup> background strain when genomic DNA was cut with EcoRI restriction enzyme. (Supplemental Fig. 1D, E).

#### **Generation and confirmation of c-myc tagged *srbA* gene expressing mutants.**

Here we utilized the 'single cross-over' insertion method. We have prepared two myc-tagged constructs, one for a full-length *srbA* (termed *srbA*-FL) and one for a truncated and thus constitutively active *srbA* (termed N-*srbA* expressing the first 425 amino acids).

**Generation of the N-*srbA* construct.** To generate the N-*srbA* construct, two fragments were cloned. The first includes a ~1.35 kb DNA fragment (the first 1275 bases of the *srbA* gene that encode the first 425 amino acids, 2 *myc*-tag sequences, the stop codon sequence TAG and a *Bam*HI restriction site), generated by Phusion high-fidelity PCR. The reverse primer was designed to contain 2 *myc*-tag sequences, the stop codon TAG and a *Bam*HI restriction site. (primers: N-SrbA-Fwd, N-SrbA-myc-Rev) (Supplemental Table S2). The second fragment includes ~0.5kb DNA fragment (downstream to the *A. fumigatus srbA* gene, flanked by *Bam*HI and *Pst*I restriction sites respectively), generated by Phusion high-fidelity PCR. The forward primer was designed to contain a *Bam*HI restriction site and the reverse primer was designed to contain a *Pst*I restriction site. (primers: N-SrbA-peptide-Fwd, N-SrbA-term-Rev) (Supplemental Table S2). These fragments was cloned into the pGEM-T easy vector separately, cut using their designated restriction enzymes and cloned into pAN8.1

vector linearized with *EcoRI* and *PstI* restriction enzymes. This vector contains the *phleo* resistance cassette (~2500 bp), as a selectable marker (Supplemental Fig. 2C).

**Generation of the *srbA*-FL-myc construct:** To generate the *srbA*-FL-myc construct, two fragments were cloned. The first, a ~2.6 kb DNA fragment (2.5 kb upstream to the *A. fumigatus srbA* gene, the first 12 bases of the gene, 2 myc tags sequences and a BamHI restriction site) generated by Phusion high-fidelity PCR with *SrbA*-promoter-Fwd, *SrbA*-myc-Rev primers (Supplemental Table S2). The second fragment includes ~3.2 kb DNA fragment (3 kb of the rest of the *A. fumigatus srbA* gene, 207 bases downstream to the gene and a BstBI restriction site), generated by Phusion high-fidelity PCR system with primers *SrbA*-peptide-Fwd, *SrbA*-term-Rev) (Supplemental Table S2). The two fragments were first subcloned into the pGEM-T easy vector (Promega, USA) and then cut with their designated restriction enzymes and cloned into the pAN8.1 vector that was linearized using *EcoRI* and *BstBI* restriction enzymes. This vector contains the *phleo* resistance cassette (~2500 bp), as a selectable marker (Supplemental Fig. 2D).

**Generation of the *AkuB*<sup>KU80</sup>GFP-*srbA* N-term, *AkuB*<sup>KU80</sup>GFP-*srbA* and *ArbDA* GFP-*srbA* N-term strains.** *A. fumigatus* CEA17 *AkuB*<sup>KU80</sup> (1) was used as a wild-type in all experiments. To generate fungal strains expressing a GFP-fused N-terminal domain of *SrbA* (GFP-*SrbA*<sub>Nterm</sub>) the xylose promoter sequence and the *gfp* gene were first amplified from the plasmid pXylpsGFP\_GEM-hph (a kind gift from Hubertus Haas)(3) using the primers P5-gfp-*srbA* and P6-gfp-*srbA* (Supplemental Table S2). Primers P3-gfp-*srbA* and P4-gfp-were used to amplify the pyrithiamin resistance cassette from pSK275 (4). Primer pairs P1/P2 and P7/8 amplified an upstream fragment and the first 813 bp of the *srbA* gene, respectively. The latter encoded the N-terminal 271 amino acids of *SrbA*. An overlap extension PCR (oePCR) was used to

join fragments P1-P2 with P3-P4 and P5-P6 with P7-P8. The resulting fragments P1-P4 were cloned into pJET1.2 (Thermo Scientific, Schwerte Germany) according to the manufacturer's instructions and fragment P5-P8 was introduced in the resulting plasmid using *AvrII* and *AscI* restriction sites (Supplemental Fig. 2E). To generate the N-terminal *gfp*-fusion with full length *srbA* the same primers were used, except that P10-srbA-fl was used to amplify full length *srbA*. The entire fusion construct of P<sub>xyl</sub>-*gfp*-*srbA*-fl was amplified using P9 and P10 as primers and cloned into pSK275 using *NotI* restriction sites (Supplemental Fig. 2F). The resulting plasmids pJET-GFP-NsrbA and pSK-GFP-srbA were purified from *E. coli* and used for the transformation of protoplasts from *A. fumigatus* CEA17 *AkuB*<sup>KU80</sup> and  $\Delta$ *rbdA*. Transformants were restreaked twice on MM agar selecting for pyrithiamine resistance and genomic integration of the cassettes was verified by PCR.

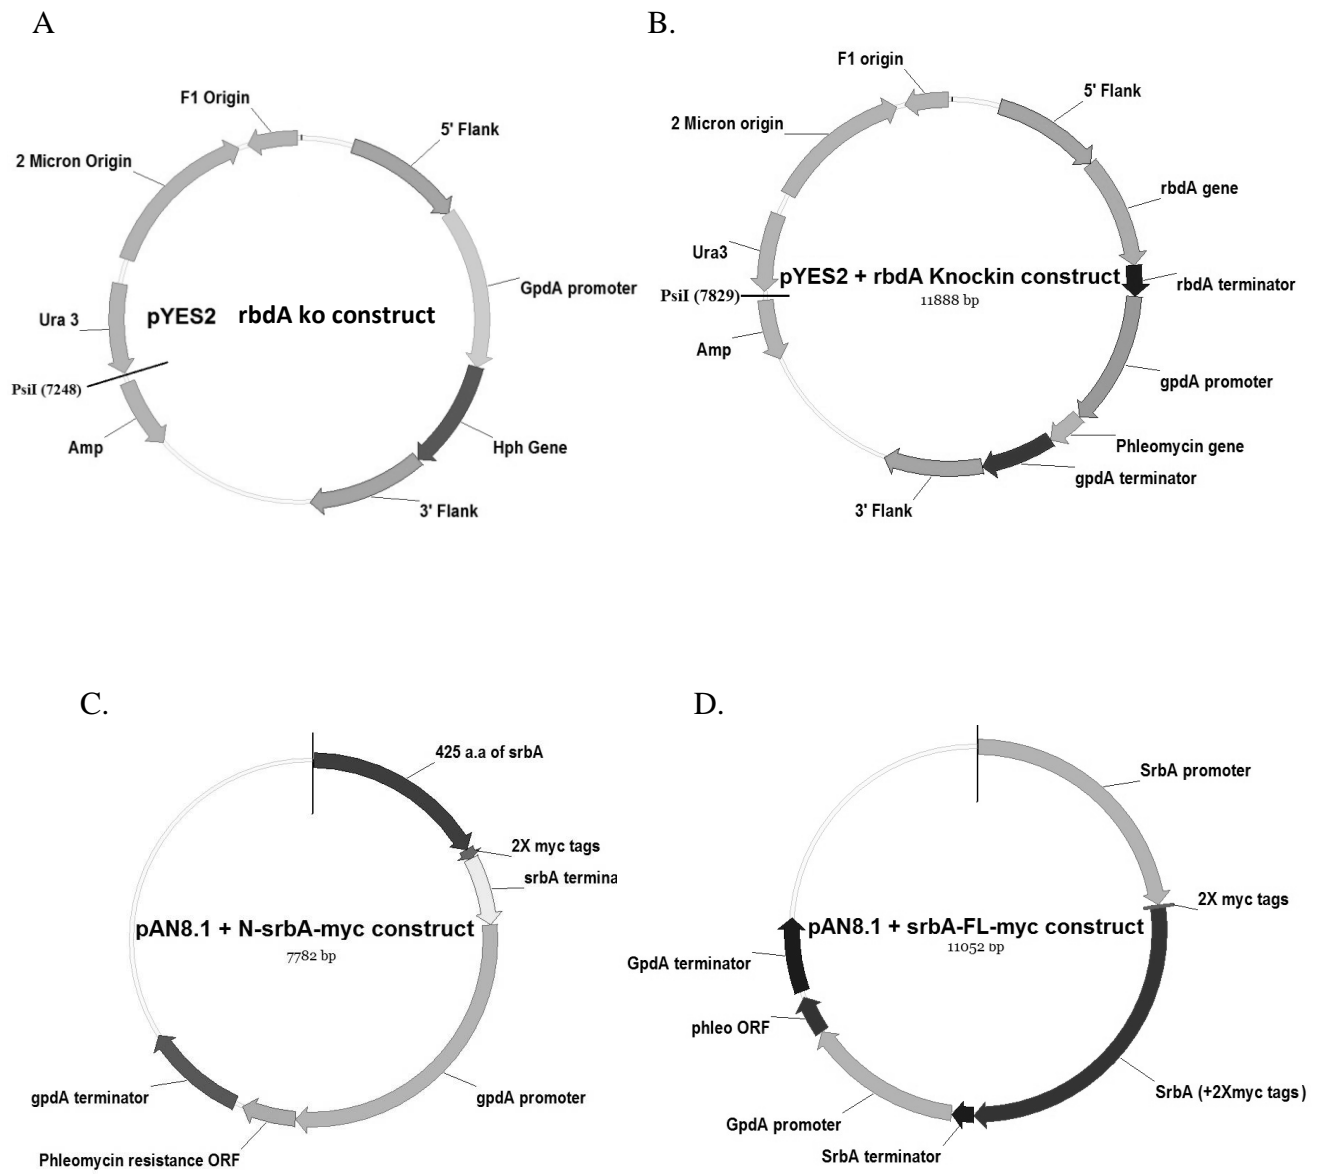

E.

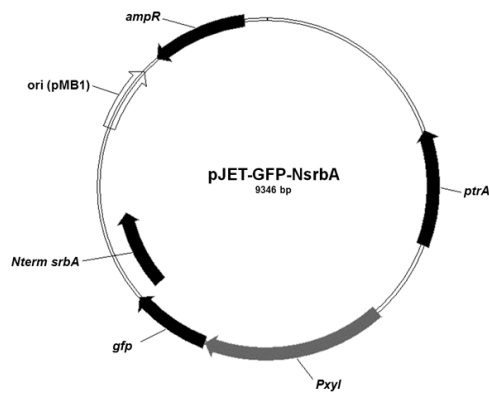

F.

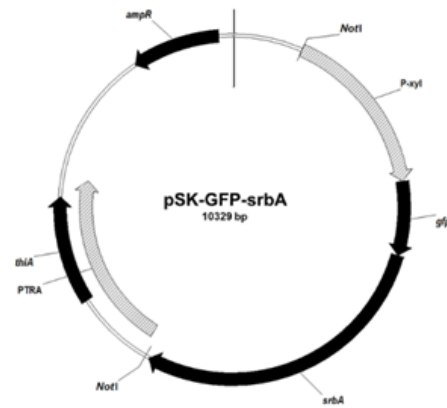

Supplemental Figure S2. Schematic drawing of plasmids (A-F) used in this work

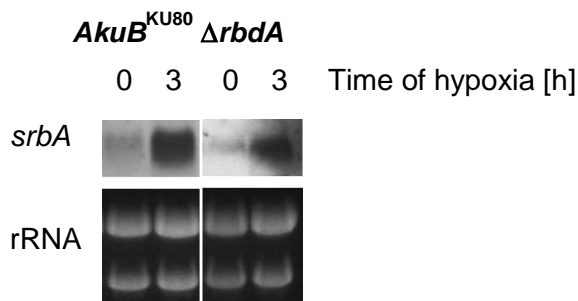

Supplemental Figure S3. Northern blot analysis of the regulation of *srbA* in the wildtype strain (*KU80*) and  $\Delta$ *rbdA* deletion strain. The strains were cultivated for 16 h in MM ( $1 \cdot 10^6$  spore/ml inoculum) under normoxic conditions and were then shifted for 3 h to hypoxic conditions (0.2% O<sub>2</sub>). 10  $\mu$ g RNA was loaded per lane. rRNA was used as loading control. The blot was hybridized with an *srbA*-specific probe prepared by PCR amplification with primers:  
 Forward 5' CGAGATTCGTAACAAGAGATTGG  
 Reverse 3' CCTCGAAATACCTGAGAAGAGC

**Supplemental Table S1. Strains used in this study**

| Strain                                    | Organism            | Genotype                                             | Source                                    |
|-------------------------------------------|---------------------|------------------------------------------------------|-------------------------------------------|
| <i>AkuB<sup>KU80</sup></i>                | <i>A. fumigatus</i> | CEA17<br><i>Afu2g02620::pyrG</i>                     | da Silva Ferreira <i>et al.</i> ,<br>2006 |
| $\Delta$ <i>rbdA</i>                      | <i>A. fumigatus</i> | <i>Afu6g12750::hph</i>                               | This work                                 |
| $\Delta$ <i>dscE</i>                      | <i>A. fumigatus</i> | <i>Afu1g14320::hph</i>                               | This work                                 |
| $\Delta$ <i>srbA</i>                      | <i>A. fumigatus</i> | <i>Afu2g01260::hph</i>                               | This work                                 |
| $\Delta$ <i>rbdA-KI</i>                   | <i>A. fumigatus</i> | <i>Afu6g12750::hph</i><br><i>Afu6g12750-phl</i>      | This work                                 |
| $\Delta$ <i>stuA</i>                      | <i>A. fumigatus</i> | <i>Afu6g14090::hph</i>                               | Sheppard <i>et al.</i> , 2005             |
| $\Delta$ <i>rbdA-NsrbA-myc</i>            | <i>A. fumigatus</i> | <i>Afu6g12750::hph</i><br><i>NsrbA-myc-phl</i>       | This work                                 |
| $\Delta$ <i>rbdA-srbA-myc</i>             | <i>A. fumigatus</i> | <i>Afu6g12750::hph srbA-</i><br><i>myc-phl</i>       | This work                                 |
| $\Delta$ <i>dscE-NsrbA-myc</i>            | <i>A. fumigatus</i> | <i>Afu1g14320::hph</i><br><i>NsrbA-myc-phl</i>       | This work                                 |
| $\Delta$ <i>dscE-srbA-myc</i>             | <i>A. fumigatus</i> | <i>Afu1g14320::hph srbA-</i><br><i>myc-phl</i>       | This work                                 |
| <i>AkuB<sup>KU80</sup>GFP-srbA N-term</i> | <i>A. fumigatus</i> | <i>Pxyl-gfp-NsrbA-ptrA</i>                           | This work                                 |
| $\Delta$ <i>rbdA GFP- srbA N-term</i>     | <i>A. fumigatus</i> | <i>Afu6g12750::hph</i><br><i>Pxyl-gfp-NsrbA-ptrA</i> | This work                                 |
| <i>AkuB<sup>KU80</sup>GFP-srbA-fl</i>     | <i>A. fumigatus</i> | <i>Pxyl-gfp-srbA-ptrA</i>                            | This work                                 |
| $\Delta$ <i>rbdA GFP-srbA-fl</i>          | <i>A. fumigatus</i> | <i>Afu6g12750::hph</i><br><i>Pxyl-gfp-srbA-ptrA</i>  | This work                                 |



**Supplemental Table S2. Oligonucleotides used in the study**

| <b>name</b>    | <b>Sequence 5'-3'</b>                                       |
|----------------|-------------------------------------------------------------|
| FHp_fw         | GCTCACTGCCCATCCCC                                           |
| FHp_rev        | CCTTGTCTCTCTCCGTGG                                          |
| 5G06240_fw     | GCACCGAGTTTCTCGCACAT                                        |
| 5G06240_rev    | GACAATCCCAGACAAGCAATG                                       |
| erg25A_fw      | CATCCCAGTGCCTAAACGAAC                                       |
| erg25A_rev     | CACGAAATCATTACTTCAGCC                                       |
| erg11A_fw      | CACACCAAGGTTGACATAAGC                                       |
| erg11A_rev     | GGACTATCTGCGCGATTAC                                         |
| P1-gfp-srbA    | GGTGATTGATGAAGAAGTGGC                                       |
| P2-gfp-srbA    | CAAGAGGCCATCTAGGCCATCTTTCAGTCTGGTCTTGGACC                   |
| P3-gfp-srbA    | GATGGCCTAGATGGCCTCTTG                                       |
| P4-gfp-srbA    | AAACCTAGGAAATTTGGCGCGCCAATTGATTACGGGATCC                    |
| P5-gfp-srbA    | AAAGGCGCGCCACTGATGCGAGCAACAGTATG                            |
| P6-gfp-srbA    | CTTGTACAGCTCGTCCATGC                                        |
| P7-gfp-srbA    | GCATGGACGAGCTGTACAAGTCCACCCCTGGCATTGGTGG                    |
| P8-gfp-srbA    | AAAACCTAGGTAACAATCTGATCAGCGG                                |
| P9-gfp-srbA-fl | AAAGCGGCCCGCCACTGATGCGAGCAACAG                              |
| P10-srbA-fl    | GCGGCCGCTTACTACAGATCCTCCTCGGAAATCAGCTTCTGCTCATCGGAGAGCAGTAG |
| P1-dscE-KO     | GCTGTAATACGACTCACTATAGGGAATATTGCAAGCGTAGCACCTTTAT           |
| P2-dscE-KO     | CAATAGTGCCACGTTCTAAATTCAACCAAGGTGATCCATACAACGACAGTAATA      |
| P3-dscE-KO     | CCCAGCACTCGTCCGAGGGCAAAGGAATAGGGGCTCCTGTTGATGTATATG         |
| P4-dscE-KO     | CATAACTAATTACATGATGCGGCCCTCTAGCGTCGTTACAGTTCCGTTT           |
| dscE-fwd-val   | CTCTACTACGCCGATCACAATG                                      |
| dscE-rev-val   | ACCCAGGCGTTTGTATCATC                                        |
| P1-rbdA-KO     | GCTGTAATACGACTCACTATAGGGAATATTGCTTCGGTGGAAAGGTAAG           |
| P2-rbdA-KO     | CAATAGTGCCACGTTCTAAATTCAACCAAGTGGCCGATGGAGGAATAA            |
| P3-rbdA-KO     | CCCAGCACTCGTCCGAGGGCAAAGGAATAGACTTGTCAACAGGTCCTTATTT        |
| P4-rbdA-KO     | CATAACTAATTACATGATGCGGCCCTCTAGTATCGACCCACGTTTAAAGTATC       |
| rbdA-fwd-val   | CGTATATGCTCCGATTACCACTT                                     |
| rbdA-rev-val   | TCAGCTTTCCTTCAATCCATCT                                      |
| P1-digA-KO     | GCTGTAATACGACTCACTATAGGGAATATTCTCCAGACATTGACGACAGATAA       |
| P2-digA-KO     | CAATAGTGCCACGTTCTAAATTCAACCAAGACGAGCCTAGCAGGTAAGA           |
| P3-digA-KO     | CCCAGCACTCGTCCGAGGGCAAAGGAATAGGACAAGCTCCGCAAGAAATTG         |
| P4-digA-KO     | CATAACTAATTACATGATGCGGCCCTCTAGTCCTAACGCTTGCATGATAGTT        |
| digA-fwd-val   | ACGAATCGCATCCTTCGTATAG                                      |
| digA-rev-val   | CGAACTCTTCTCAGCGTAACT                                       |
| P5-rbdA-KI     | ATACAATGCTCATCATAACATTCCACCTGGCTGCGCGTGTCTTCTGATTT          |
| P6-rbdA-KI     | CGTTTACCCAGAATGCACAGGTACACTTGTATTCTTGGTTTTGTCCGCGACAT       |

|                 |                                                                                                     |
|-----------------|-----------------------------------------------------------------------------------------------------|
| P7-rbdA-KI      | CATAACTAATTACATGATGCGGCCCTCTAGAGTTGCCCGTTGACACCATC                                                  |
| Hyg-fwd         | GTTTCTGATCGAAAAGTTCGACAG                                                                            |
| Hyg-rev         | CGTCGGTTTCCACTATCGGCG                                                                               |
| Phleo-fwd       | TAATTGGCCCATCCGGCATCTGTA                                                                            |
| Phleo-rev       | AGCTGACATCGACACCAACGATCT                                                                            |
| srbAFL-prm-fwd  | ATCAATTGCTCCAGGGACCTTC                                                                              |
| srbAFL-myc-rev  | ATGGATCCCAAGTCCTCTTCAGAAATGAGCTTTTGGCCGCCCAAGTCCTCTTCAG<br>AAATGAGCTTTTGGCCGCCGGGGTGGACATCGTGTTTC   |
| srbAFL-pep-fwd  | ATGGATCCGGCATTGGTGGGGATTTCCA                                                                        |
| srbAFL-term-rev | ATTTCGAACCGAGAGAGAAACGCCTTGTA                                                                       |
| N-srbA-fwd      | ATGTCCACCCCGGCATTGG                                                                                 |
| N-srbA-myc-rev  | ATGGATCCCTACAAGTCCTCTTCAGAAATGAGCTTTTGGCCGCCCAAGTCCTCTT<br>CAGAAATGAGCTTTTGGCCGCCAATTGCGCGCGGTGCCAA |
| N-srbA-term-fwd | ATGGATCCTGATGATGACGCTACTGCCAG                                                                       |
| N-srbA-term-rev | ATCTGCAGGCGTAAGTCTAGTCCCCTGAAA                                                                      |
| srbA-myc-val-fw | TGAACTTAAACCCGCAGTTAGCC                                                                             |
| srbA-myc-val-re | TTTTGGCCGCCCAAGTCCTC                                                                                |
| SrbA-prom-fwd   | ATCAATTGCTCCAGGGACCTTC                                                                              |
| SrbA-myc-Rev    | ATGGATCCCAAGTCCTCTTCAGAAATGAGCTTTTGGCCGCCCAAGTCCTCTTCAGAAATGAGCTTTTGGCC<br>CCGGGGTGGACATCGTGTTTC    |
| SrbA-pept-fwd   | ATGGATCCGGCATTGGTGGGGATTTCCA                                                                        |
| SrbA-term-Rev   | ATTTCGAACCGAGAGAGAAACGCCTTGTA                                                                       |
| N-SrbA-fwd      | ATGTCCACCCCGGCATTGG                                                                                 |
| SrbA-myc-Rev    | ATGGATCCCTACAAGTCCTCTTCAGAAATGAGCTTTTGGCCGCCCAAGTCCTCTTCAGAAATGAGCTTTTGG<br>CCGCCAATTGCGCGCGGTGCCAA |
| N-SrbA-term-fwd | ATGGATCCTGATGATGACGCTACTGCCAG                                                                       |
| N-SrbA-term-rev | ATCTGCAGGCGTAAGTCTAGTCCCCTGAAA                                                                      |

| Gene name    | Primer sequence                                                                    |
|--------------|------------------------------------------------------------------------------------|
| <i>Mpo</i>   | Forward, 5'-TTACACCCCAGGCATAAAAA-3'<br>Reverse, 5'-TTCCATACAGCTCAGCACAA-3'         |
| <i>Cxcl1</i> | Forward, 5'-CCGCTCGCTTCTCTGTGC-3'<br>Reverse, 5'-CTCTGGATGTTCTTGAGGTGAATC-3'       |
| <i>Tnfa</i>  | Forward, 5'-CGAGTGACAAGCCTGTAGCC-3'<br>Reverse, 5'-AAGAGAACCTGGGAGTAGACAAG-3'      |
| <i>Ifng</i>  | Forward, 5'-ACTGGCAAAGGATGGTGAC-3'<br>Reverse, 5'-TGAGCTCATTGAATGCTTGG-3'          |
| <i>Il17a</i> | Forward, 5'-GACTACCTCAACCGTTCCAC-3'<br>Reverse, 5'-CCTCCGCATTGACACAGC-3'           |
| <i>Il4</i>   | Forward, 5'-CGGCATTTTGAACGAGGTCACAGG-3'<br>Reverse, 5'-AGCACCTTGGAAGCCCTACAGACG-3' |
| <i>Il10</i>  | Forward, 5'-CCCTTTGCTATGGTGTCCCT-3'<br>Reverse, 5'-TGGTTTCTCTTCCCAAGACC-3'         |
| <i>Il1b</i>  | Forward, 5'-TGACGGACCCCAAAGATGAAGG-3'<br>Reverse, 5'-CCACGGGAAAGACACAGGTAGC-3'     |
| <i>Rage</i>  | Forward, 5'-GGAATTGTCGATGAGGGGAC-3'                                                |

| Gene name   | Primer sequence                        |
|-------------|----------------------------------------|
|             | Reverse, 5'-CAACAGCTGATTGCCCTCTG -3'   |
| <i>S100</i> | Forward, 5'-GCCCTCATTGATGTCTTCCACC -3' |

### Supplemental References

1. **da Silva Ferreira ME, Kress MR, Savoldi M, Goldman MH, Hartl A, Heinekamp T, Brakhage AA, Goldman GH.** 2006. The *akuB(KU80)* mutant deficient for nonhomologous end joining is a powerful tool for analyzing pathogenicity in *Aspergillus fumigatus*. *Eukaryot Cell* **5**:207-211.
2. **Levdansky E, Kashi O, Sharon H, Shadkchan Y, Osherov N.** 2010. The *Aspergillus fumigatus cspA* gene encoding a repeat-rich cell wall protein is important for normal conidial cell wall architecture and interaction with host cells. *Eukaryot Cell* **9**:1403-1415.
3. **Zadra I, Abt B, Parson W, Haas H.** 2000. *xylP* promoter-based expression system and its use for antisense downregulation of the *Penicillium chrysogenum* nitrogen regulator NRE. *Appl Environ Microbiol* **66**:4810-4816.
4. **Krappmann S, Jung N, Medic B, Busch S, Prade RA, Braus GH.** 2006. The *Aspergillus nidulans* F-box protein *GrrA* links SCF activity to meiosis. *Mol Microbiol* **61**:76-88.
5. **Gehrke A, Heinekamp T, Jacobsen ID, Brakhage AA.** 2010. Heptahelical receptors GprC and GprD of *Aspergillus fumigatus* Are essential regulators of colony growth, hyphal morphogenesis, and virulence. *Appl Environ Microbiol* **76**:3989-3998.
